# Supplementary material
Source: publisher figshare collection journal article supplement (https://future-science-group.figshare.com/ndownloader/files/30807400)
Supplement: Supplementary file 1 [file 30807400]

| **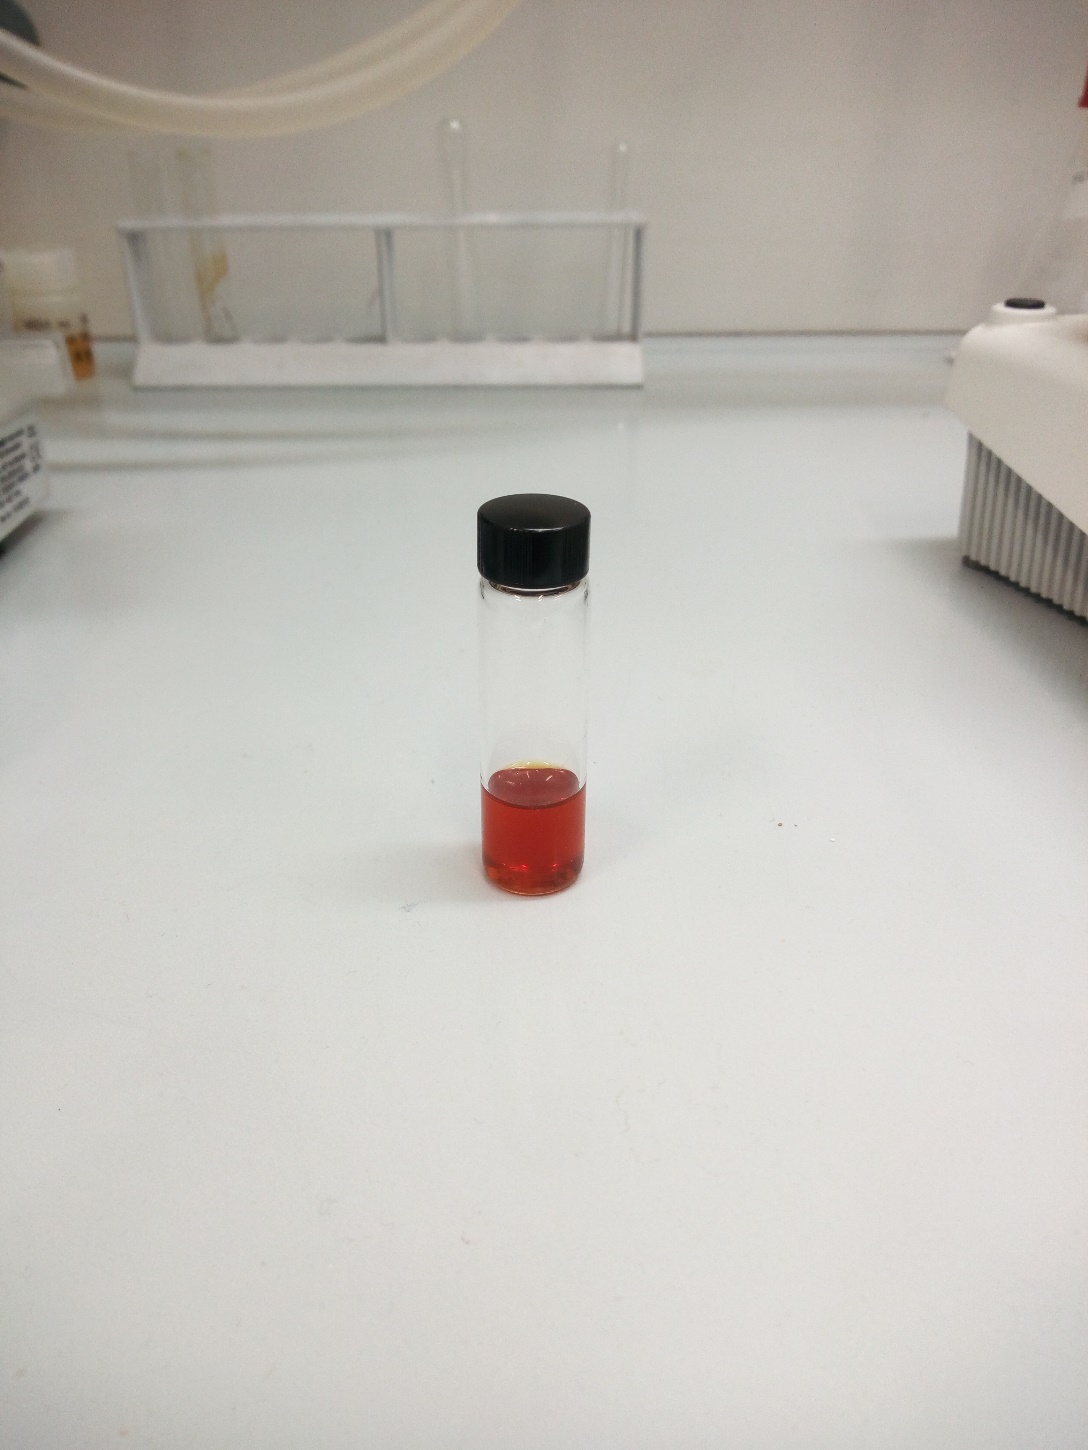** | **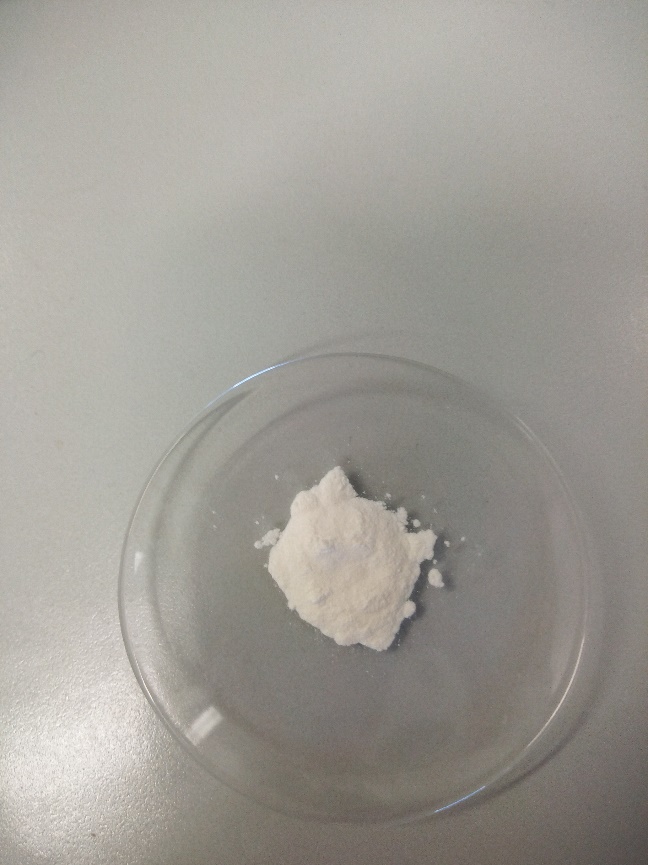** |
| --- | --- |

**Figure S1**. *AnchoisOil* extracted from anchovy filleting waste (*left*), *Omeg@Silica* comprised of MCM-41 silica loaded with 50% w/w fish oil (*right*).
